# Supplementary material for: pH-responsive high internal phase emulsions stabilized by core cross-linked star (CCS) polymers
Source: Royal Society of Chemistry journal article supplement (doi:10.1039/c3py00488k), 2013-01-01
Supplement: c3py00488k.pdf [file c3py00488k.pdf]

## pH-Responsive high internal phase emulsions stabilized by core cross-linked star (CCS) polymers

### Supporting Information

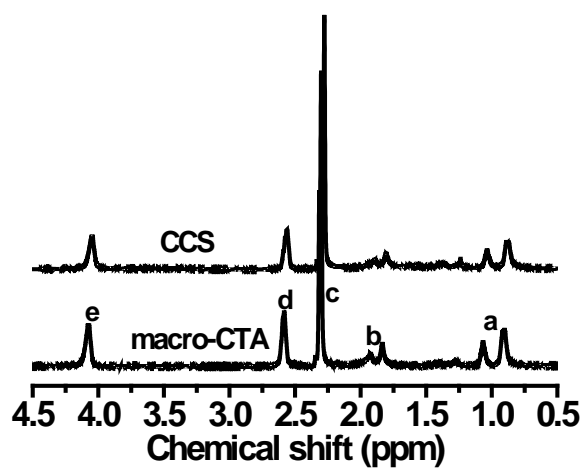

**Fig. S1** <sup>1</sup>H NMR spectra in CDCl<sub>3</sub> of the PDMAEMA macro-CTA and PDMAEMA CCS polymer.

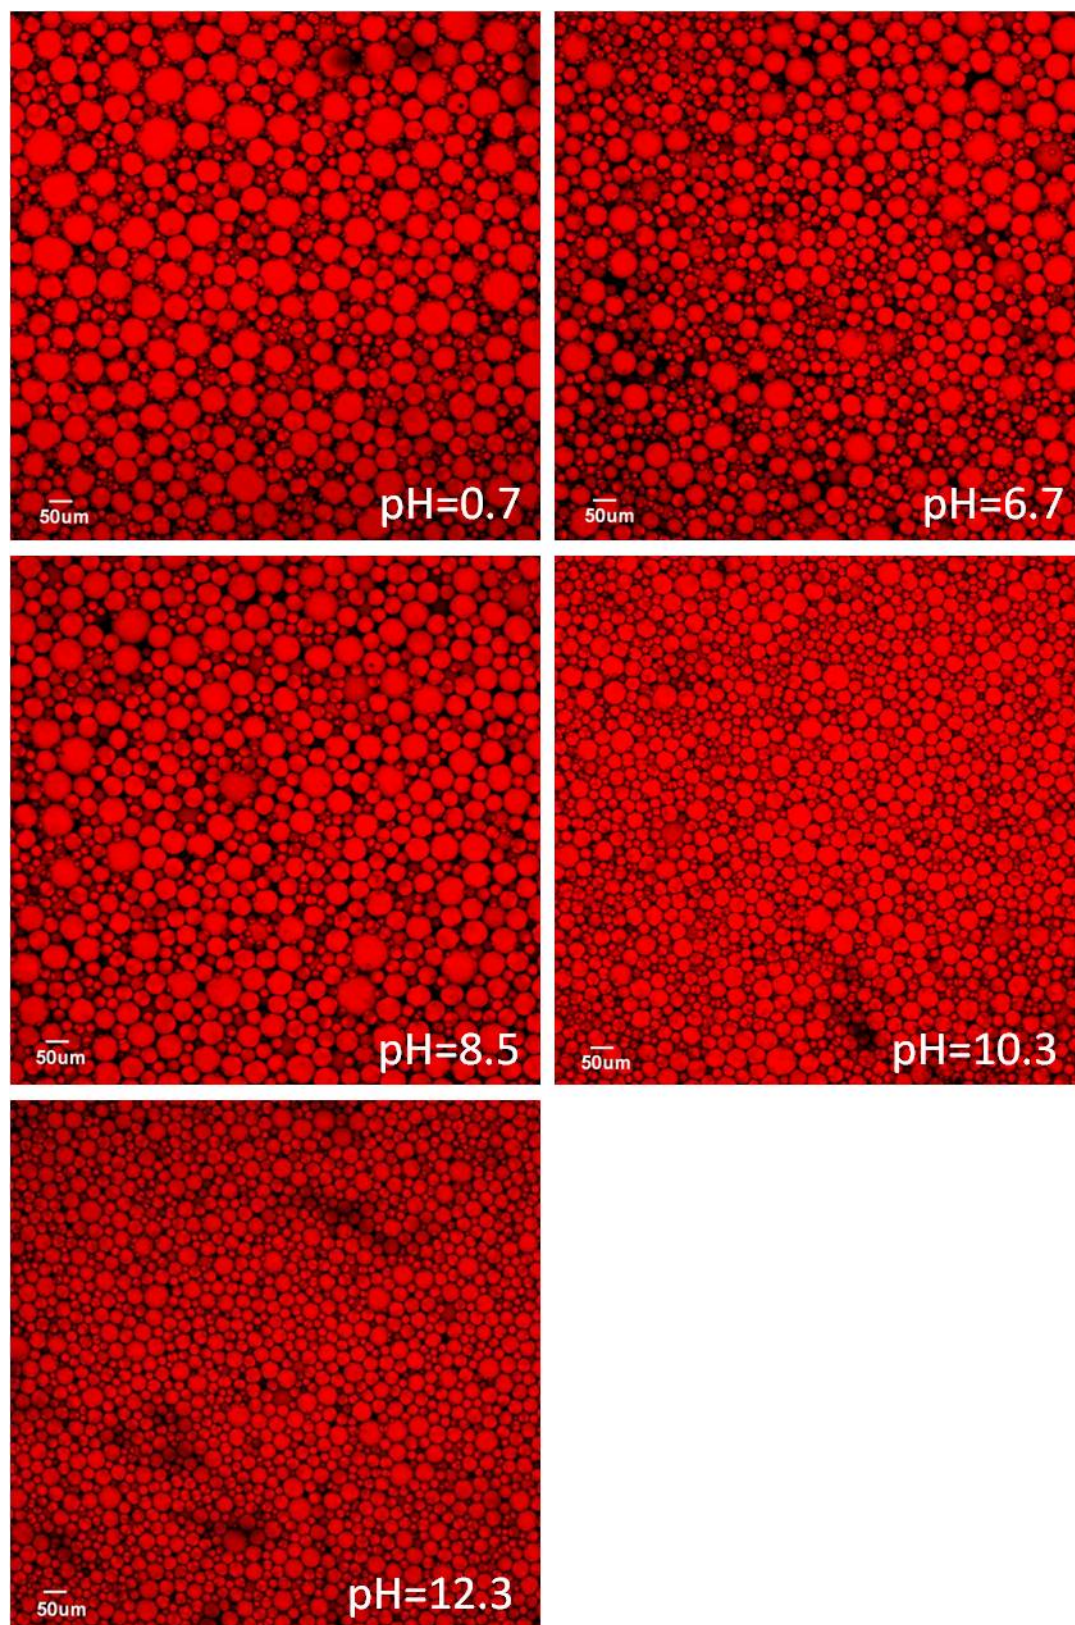

**Fig. S2** CLSM images of HIPEs (0.5 wt% CCS solution, 80 vol% oil) at different pH values. All the scale bars are 50 μm.
